# Supplementary material
Source: MDPI journal article supplement (https://www.mdpi.com/2039-7283/11/4/95)
Supplement: s1 [file s1]

**Participant's living with type 2 diabetes data collection form**  
**The National Institute of Nutrition and Food Technology of Tunis in Tunisia**

Family Name:..... ID number:..... Address:.....

Tel number: .....

Age:..... Sex: F ☐ M ☐ Menopause (for F) : yes ☐ no ☐

Past history: Arterial hypertension: yes ☐ no ☐

Dyslipidemia: yes ☐ no ☐ : type:

Others:.....

**Clinical examination:**

Blood pressure:.../.....mmHg Heart beats:..... bpm

|    | Weight (kg) | Height (m) | BMI (kg/m <sup>2</sup> ) |
|----|-------------|------------|--------------------------|
| T0 |             |            |                          |

**Diabetes:**

Diabetes duration: .....(years)

Diabetes Complications:

❖ Microvascular:

✓ Diabetic retinopathy: yes ☐ no ☐

Diabetic nephropathy: yes ☐ no ☐

✓ Diabetic neuropathy: yes ☐ no ☐

❖ Macrovascular:

✓ Coronary heart disease: yes ☐ no ☐

✓ Cerebrovascular diseases: yes ☐ no ☐ type : Acute cerebral stroke ☐

Transient ischemic attack ☐

✓ Peripheral artery disease:      yes ☐    no ☐

**Biological Data:**

|                                                |  |
|------------------------------------------------|--|
| <b>Fasting blood glucose (mmol/l)</b>          |  |
| <b>HbA1c (%)</b>                               |  |
| <b>Plasmatic magnesium level (mmol/l)</b>      |  |
| <b>24h magnesium (mmol/l)</b>                  |  |
| <b>Magnesium intake (mg/24h)</b>               |  |
| <b>Total cholesterol (mmol/l)</b>              |  |
| <b>HDL-c (mmol/l)</b>                          |  |
| <b>LDL-c ( mmol/l)</b>                         |  |
| <b>Triglycerides (mmol/l)</b>                  |  |
| <b>Clearance creatinine (CKD-EPI) (mmol/l)</b> |  |
